# Supplementary material for: Epidemiology of thalassemia among the hill tribe population in Thailand
Source: PubMed Central journal article supplement (PMC7877639; doi:10.1371/journal.pone.0246736), 2021-02-11
Supplement: pone.0246736.s001.pdf [file pone.0246736.s001.pdf]

**แบบสอบถามโครงการวิจัย**  
เรื่อง อัตราความชุกของการเป็นพาหะธาลัสซีเมียในชาวเขา

1. อายุ \_\_\_\_\_ ปี
2. เพศ     ชาย     หญิง
3. น้ำหนัก \_\_\_\_\_ กิโลกรัม    ส่วนสูง \_\_\_\_\_ เซนติเมตร
4. ท่านนับถือศาสนาใด  
 พุทธ                       คริสต์                       อิสลาม                       อื่นๆ(โปรดระบุ) \_\_\_\_\_
5. ท่านเรียนอยู่ชั้นอะไร  
 ประถมศึกษาปีที่ 4     ประถมศึกษาปีที่ 5     ประถมศึกษาปีที่ 6
6. ท่านมีจำนวนสมาชิกในครอบครัว \_\_\_\_\_ คน เป็นพี่น้องร่วมสายโลหิต (ที่ยังมีชีวิตอยู่) \_\_\_\_\_ คน
7. คุณพ่อเป็นเผ่าอะไร  
 อาข่า (อีก้อ)               ลานู (มูเซอ)                       ลีซู  
 ม้ง                               เย้า                                       กะเหรี่ยง  
 ไทยใหญ่                       ลัวะ                                       ไทยลื้อ  
 จีนฮ่อ                               อื่นๆ (โปรดระบุ) \_\_\_\_\_
8. คุณแม่เป็นเผ่าอะไร  
 อาข่า (อีก้อ)               ลานู (มูเซอ)                       ลีซู  
 ม้ง                               เย้า                                       กะเหรี่ยง  
 ไทยใหญ่                       ลัวะ                                       ไทยลื้อ  
 จีนฮ่อ                               อื่นๆ (โปรดระบุ) \_\_\_\_\_
9. คุณปู่(พ่อของพ่อ) เผ่าอะไร  
 อาข่า (อีก้อ)               ลานู (มูเซอ)                       ลีซู  
 ม้ง                               เย้า                                       กะเหรี่ยง  
 ไทยใหญ่                       ลัวะ                                       ไทยลื้อ  
 จีนฮ่อ                               อื่นๆ (โปรดระบุ) \_\_\_\_\_
10. คุณย่า (แม่ของพ่อ) เป็นเผ่าอะไร  
 อาข่า (อีก้อ)               ลานู (มูเซอ)                       ลีซู  
 ม้ง                               เย้า                                       กะเหรี่ยง  
 ไทยใหญ่                       ลัวะ                                       ไทยลื้อ  
 จีนฮ่อ                               อื่นๆ (โปรดระบุ) \_\_\_\_\_

11. คุณตา (พ่อของแม่) เป็นเผ่าอะไร

- |                                        |                                                 |                                    |
|----------------------------------------|-------------------------------------------------|------------------------------------|
| <input type="checkbox"/> อาข่า (อีโก้) | <input type="checkbox"/> ลานู (มุเซอ)           | <input type="checkbox"/> ลีซู      |
| <input type="checkbox"/> ม้ง           | <input type="checkbox"/> เข่า                   | <input type="checkbox"/> กะเหรี่ยง |
| <input type="checkbox"/> ไทยใหญ่       | <input type="checkbox"/> ลัวะ                   | <input type="checkbox"/> ไทยลื้อ   |
| <input type="checkbox"/> จีนฮ่อ        | <input type="checkbox"/> อื่นๆ (โปรดระบุ) _____ |                                    |

12. คุณยาย (แม่ของแม่) เป็นเผ่าอะไร

- |                                        |                                                 |                                    |
|----------------------------------------|-------------------------------------------------|------------------------------------|
| <input type="checkbox"/> อาข่า (อีโก้) | <input type="checkbox"/> ลานู (มุเซอ)           | <input type="checkbox"/> ลีซู      |
| <input type="checkbox"/> ม้ง           | <input type="checkbox"/> เข่า                   | <input type="checkbox"/> กะเหรี่ยง |
| <input type="checkbox"/> ไทยใหญ่       | <input type="checkbox"/> ลัวะ                   | <input type="checkbox"/> ไทยลื้อ   |
| <input type="checkbox"/> จีนฮ่อ        | <input type="checkbox"/> อื่นๆ (โปรดระบุ) _____ |                                    |

13. ท่านมีโรคประจำตัวหรือไม่

- ไม่มี
- มี ได้แก่ (ตอบได้มากกว่า 1 ข้อ)
- |                                                 |                                          |
|-------------------------------------------------|------------------------------------------|
| <input type="checkbox"/> โรคเบาหวาน             | <input type="checkbox"/> ไขมันในเลือดสูง |
| <input type="checkbox"/> โรคหัวใจ               | <input type="checkbox"/> โรคภูมิแพ้      |
| <input type="checkbox"/> โรคหอบหืด              | <input type="checkbox"/> โรคกระเพาะอาหาร |
| <input type="checkbox"/> โรคกระดูกและข้อ        | <input type="checkbox"/> โรคมะเร็ง       |
| <input type="checkbox"/> อื่นๆ (โปรดระบุ) _____ |                                          |

14. ท่านเคยมีอาการใด หรือตรวจพบอาการเหล่านี้บ้างหรือไม่ (ตอบได้มากกว่า 1 ข้อ)

- |                                            |                                                    |
|--------------------------------------------|----------------------------------------------------|
| <input type="checkbox"/> โลหิตจาง          | <input type="checkbox"/> ซีดเขียว                  |
| <input type="checkbox"/> อ่อนล้า/อ่อนเพลีย | <input type="checkbox"/> มีเลือดปนในปัสสาวะ        |
| <input type="checkbox"/> หายใจสั้น         | <input type="checkbox"/> ภาวะดีซ่าน/อาการตัวเหลือง |
| <input type="checkbox"/> ม้ามโต            | <input type="checkbox"/> ตับโต                     |

15. ท่านเคยได้รับเลือดเพราะภาวะซีด

- ไม่เคย       เคย

16. พี่หรือน้องของท่าน เคยได้รับเลือดเพราะภาวะซีด

- ไม่มี       มี (โปรดระบุ) \_\_\_\_\_

17. บุคคลในเครือญาติของท่าน เคยได้รับเลือดเพราะภาวะซีด

- ไม่มี       มี (โปรดระบุ) \_\_\_\_\_

18. ท่านเคยกินยาบำรุงเลือด หรือเสริมธาตุเหล็กหรือไม่

- ไม่เคย       เคย
